# Supplementary material for: Search for Highly Divergent Tandem Repeats in Amino Acid Sequences
Source: MDPI journal article supplement (doi:10.3390/ijms22137096), 2021-07-01
Supplement: s1 [file s1]

SUPPLEMENTED MATERIALS

Matrices of 19 classes obtained as a result of classification of TRs with consensus length 2. Number of elements in each class: {3, 6, 178, 122, 23, 98, 12, 30, 767, 87, 14, 86, 95, 108, 13, 112, 176, 32, 142}. Matrix element  $(p, a_i a_j)$ ,  $a_i, a_j = \{K, N, I, M, T\}$  should be interpreted as  $a_i$  before  $a_j$ ,  $a_j$  in consensus position  $p$ . Symbols  $\{K, N, I, M, T\}$  were obtained by re-coding of amino acid sequences according to side-chain polarity:  $K = \{G, A, V, I, L, P\}$ ;  $N = \{S, T, C, M, Q, N\}$ ;  $I = \{F, Y, W\}$ ;  $M = \{K, R, H\}$ ;  $T = \{D, E\}$

| CLASS0 |       |       |       |       |       |       |       |       |       |       |       |       |       |       |       |       |       |       |       |       |       |       |       |       |       |
|--------|-------|-------|-------|-------|-------|-------|-------|-------|-------|-------|-------|-------|-------|-------|-------|-------|-------|-------|-------|-------|-------|-------|-------|-------|-------|
| p      | KK    | KN    | KI    | KM    | KT    | NK    | NN    | NI    | NM    | NT    | IK    | IN    | II    | IM    | IT    | MK    | MN    | MI    | MM    | MT    | TK    | TN    | TI    | TM    | TT    |
| 1      | -0,23 | 0,4   | 0,27  | 0,1   | -0,9  | -0,03 | 3,03  | 2,13  | -2,27 | 0,97  | -0,27 | 0,37  | 2,27  | -1,07 | -0,4  | -6,67 | -1,93 | -1,17 | 2,83  | -1,67 | 2,63  | 0,23  | -0,43 | -1,07 | 1,33  |
| 2      | -2,33 | 1,6   | 1,73  | -1,77 | 0,3   | 0,8   | 1,63  | 0,9   | -2    | 0,1   | -0,27 | 2,77  | -0,4  | -0,93 | 0,03  | -3,4  | -1,93 | -1,5  | 1,8   | 1,13  | -0,37 | 0,37  | -0,43 | -1,07 | -0,47 |
| CLASS1 |       |       |       |       |       |       |       |       |       |       |       |       |       |       |       |       |       |       |       |       |       |       |       |       |       |
| p      | KK    | KN    | KI    | KM    | KT    | NK    | NN    | NI    | NM    | NT    | IK    | IN    | II    | IM    | IT    | MK    | MN    | MI    | MM    | MT    | TK    | TN    | TI    | TM    | TT    |
| 1      | -1,32 | -0,93 | 1,18  | 1,3   | -0,27 | -5,42 | 2,13  | -1,17 | 0,03  | -1,77 | 2,62  | -0,72 | -0,1  | 0,4   | -0,43 | -0,72 | -1,15 | -0,18 | 0,13  | 0,9   | 1,55  | -0,33 | 0,42  | 0,62  | 0,95  |
| 2      | 1,57  | -2,82 | 0,6   | 0,35  | 2,17  | -5,78 | 3,27  | -0,75 | -0,95 | -1    | 0,13  | -1,6  | 0,85  | 0,1   | 1,43  | 0,12  | -1,52 | 2,17  | 0,02  | 3,83  | -0,85 | -1,27 | 0,53  | -0,17 | -0,68 |
| CLASS2 |       |       |       |       |       |       |       |       |       |       |       |       |       |       |       |       |       |       |       |       |       |       |       |       |       |
| p      | KK    | KN    | KI    | KM    | KT    | NK    | NN    | NI    | NM    | NT    | IK    | IN    | II    | IM    | IT    | MK    | MN    | MI    | MM    | MT    | TK    | TN    | TI    | TM    | TT    |
| 1      | -0,27 | -3,79 | 0,06  | 0,41  | 0,04  | -4,29 | 3,18  | -0,76 | -0,99 | -1,12 | 0,36  | -0,82 | 0,31  | 0,43  | 0,52  | 0,15  | -1,89 | 0,21  | 1,32  | 0,53  | -0,02 | -1,42 | 0,46  | 0,51  | 1,34  |
| 2      | -0,36 | -0,21 | 1,06  | 0,8   | 1,02  | -7,74 | 2,96  | -0,85 | -1,51 | -1,41 | -0,46 | -0,74 | 0,34  | 0,21  | 0,27  | -0,57 | -0,92 | 0,27  | 1,09  | 0,72  | -0,7  | -1,05 | 0,61  | 0,41  | 0,98  |
| CLASS3 |       |       |       |       |       |       |       |       |       |       |       |       |       |       |       |       |       |       |       |       |       |       |       |       |       |
| p      | KK    | KN    | KI    | KM    | KT    | NK    | NN    | NI    | NM    | NT    | IK    | IN    | II    | IM    | IT    | MK    | MN    | MI    | MM    | MT    | TK    | TN    | TI    | TM    | TT    |
| 1      | -2,14 | 0,6   | 0,87  | 1,56  | 0,5   | -6,98 | 2,8   | -0,88 | -0,99 | -1,8  | -0,56 | -0,74 | 0,32  | 0,5   | 0,54  | -1,47 | -1,33 | 0,1   | 1,21  | -0,14 | -1,03 | -1,52 | 0,49  | 0,34  | 2,21  |
| 2      | -2,42 | -2,77 | 0,1   | -0,16 | -0,05 | -3,49 | 2,71  | -0,55 | -1,28 | -1,38 | 0,14  | -0,88 | 0,32  | -0,02 | 0,51  | 0,53  | -1,11 | 0,51  | 1,1   | 0,46  | -0,46 | -1,79 | 0,2   | -0,11 | 2,1   |
| CLASS4 |       |       |       |       |       |       |       |       |       |       |       |       |       |       |       |       |       |       |       |       |       |       |       |       |       |
| p      | KK    | KN    | KI    | KM    | KT    | NK    | NN    | NI    | NM    | NT    | IK    | IN    | II    | IM    | IT    | MK    | MN    | MI    | MM    | MT    | TK    | TN    | TI    | TM    | TT    |
| 1      | -2,09 | -0,57 | 0,24  | -0,47 | 0,59  | -4,88 | 2,46  | -0,39 | -1,3  | -1,01 | 0,22  | -0,3  | 0,24  | -0,1  | 0     | -1,21 | -1,44 | 0,17  | 0,39  | 4,14  | -1,7  | -1,69 | -0,13 | -0,66 | 0,09  |
| 2      | -2,5  | -0,1  | 0,01  | -0,31 | -0,26 | -4,72 | 2,32  | -0,21 | -1,01 | -1,89 | -0,05 | -0,38 | -0,3  | 0,18  | -0,29 | -1,33 | -1,45 | -0,17 | 0,07  | -0,51 | -1,23 | -1,51 | 1,45  | 4,22  | 0,45  |
| CLASS5 |       |       |       |       |       |       |       |       |       |       |       |       |       |       |       |       |       |       |       |       |       |       |       |       |       |
| p      | KK    | KN    | KI    | KM    | KT    | NK    | NN    | NI    | NM    | NT    | IK    | IN    | II    | IM    | IT    | MK    | MN    | MI    | MM    | MT    | TK    | TN    | TI    | TM    | TT    |
| 1      | -5,32 | -0,99 | -0,45 | -2,24 | -0,88 | -1,81 | 0,52  | -0,14 | -1,04 | -0,2  | 0,37  | 0,2   | 0,02  | -0,48 | -0,19 | 3,94  | 1     | 0,01  | -1,21 | 0,12  | 0,13  | -0,25 | 0,07  | -0,92 | 0,41  |
| 2      | -5,23 | 0,18  | 0,72  | 5,77  | 1,4   | -3,19 | 0,66  | -0,01 | 0,8   | 0,12  | -0,85 | 0,09  | -0,15 | -0,04 | -0,11 | -3,86 | -1,09 | -0,24 | -1,26 | -1    | -2,26 | -0,13 | 0,19  | 0,34  | 0,11  |
| CLASS6 |       |       |       |       |       |       |       |       |       |       |       |       |       |       |       |       |       |       |       |       |       |       |       |       |       |
| p      | KK    | KN    | KI    | KM    | KT    | NK    | NN    | NI    | NM    | NT    | IK    | IN    | II    | IM    | IT    | MK    | MN    | MI    | MM    | MT    | TK    | TN    | TI    | TM    | TT    |
| 1      | -5,44 | 2,29  | 6     | 1,99  | 0,47  | -3,54 | -0,08 | -0,02 | 0,83  | 0,22  | -3,24 | -0,86 | -1,09 | -0,97 | -0,66 | -1,97 | -0,48 | -0,77 | 0,49  | -0,1  | -1,14 | 0,14  | 0,13  | -0,26 | 0,32  |
| 2      | -5,71 | -1,44 | -1,85 | -0,99 | -0,65 | 0,47  | -0,08 | -1,22 | -0,51 | 0,62  | 3,99  | -0,14 | -1,32 | -0,72 | 0,24  | 1,47  | -0,01 | -0,65 | -0,1  | -0,02 | -0,48 | 0,34  | 0     | 0,16  | -0,46 |

| CLASS7  |       |       |       |       |       |       |       |       |       |       |       |       |       |       |       |       |       |       |       |       |       |       |       |       |       |
|---------|-------|-------|-------|-------|-------|-------|-------|-------|-------|-------|-------|-------|-------|-------|-------|-------|-------|-------|-------|-------|-------|-------|-------|-------|-------|
| p       | KK    | KN    | KI    | KM    | KT    | NK    | NN    | NI    | NM    | NT    | IK    | IN    | II    | IM    | IT    | MK    | MN    | MI    | MM    | MT    | TK    | TN    | TI    | TM    | TT    |
| 1       | -3,69 | -2,39 | -0,3  | -0,88 | -0,9  | -2,26 | 1,64  | 0,2   | -0,86 | -0,13 | 0,17  | -0,52 | 0,11  | -0,01 | -0,27 | 3,49  | -0,96 | 0,04  | -0,09 | -0,37 | -1,05 | -0,94 | 0,03  | -1    | 1,38  |
| 2       | -4,24 | 4,23  | 0,03  | 0,69  | 0,67  | -5,39 | -0,82 | 0,16  | 1,42  | -0,4  | -0,84 | 0,42  | 0,03  | -0,2  | -0,05 | -2,33 | -0,81 | -0,18 | -0,48 | -0,71 | -2,35 | -0,36 | -0,07 | 0,82  | 0,54  |
| CLASS8  |       |       |       |       |       |       |       |       |       |       |       |       |       |       |       |       |       |       |       |       |       |       |       |       |       |
| p       | KK    | KN    | KI    | KM    | KT    | NK    | NN    | NI    | NM    | NT    | IK    | IN    | II    | IM    | IT    | MK    | MN    | MI    | MM    | MT    | TK    | TN    | TI    | TM    | TT    |
| 1       | -5,72 | 6,18  | 0,6   | 1,35  | 1,27  | -5,54 | -1,18 | -0,57 | -0,76 | -0,82 | -1,32 | 0,44  | -0,08 | 0,13  | 0,04  | -1,95 | 0,09  | 0,12  | -0,08 | 0,05  | -1,78 | 0,05  | 0,14  | 0,13  | 0,01  |
| 2       | -5,73 | -2,76 | -0,66 | -0,81 | -0,79 | 3,18  | -1,17 | 0,49  | 0,13  | 0,19  | 0,03  | -0,64 | -0,08 | -0,1  | 0,04  | 0,15  | -0,72 | 0,12  | -0,09 | 0,02  | 0,25  | -0,95 | 0,06  | 0,1   | 0,01  |
| CLASS9  |       |       |       |       |       |       |       |       |       |       |       |       |       |       |       |       |       |       |       |       |       |       |       |       |       |
| p       | KK    | KN    | KI    | KM    | KT    | NK    | NN    | NI    | NM    | NT    | IK    | IN    | II    | IM    | IT    | MK    | MN    | MI    | MM    | MT    | TK    | TN    | TI    | TM    | TT    |
| 1       | -5,42 | -1,04 | -0,24 | -0,96 | -2,21 | -1,41 | 0,04  | 0,31  | 0,55  | -1,02 | -0,57 | 0,17  | 0,06  | -0,13 | -0,31 | -0,32 | -0,01 | 0,22  | 0,24  | -0,87 | 4,7   | 0,43  | -0,04 | -0,21 | -1,4  |
| 2       | -5,54 | 1,3   | 0,26  | 1,08  | 5,94  | -3,31 | 0,27  | -0,11 | 0,04  | 0,58  | -0,82 | 0,3   | 0,08  | 0,1   | 0,2   | -1,86 | -0,05 | -0,07 | 0,24  | -0,08 | -3,81 | -1,12 | -0,33 | -0,99 | -1,3  |
| CLASS10 |       |       |       |       |       |       |       |       |       |       |       |       |       |       |       |       |       |       |       |       |       |       |       |       |       |
| p       | KK    | KN    | KI    | KM    | KT    | NK    | NN    | NI    | NM    | NT    | IK    | IN    | II    | IM    | IT    | MK    | MN    | MI    | MM    | MT    | TK    | TN    | TI    | TM    | TT    |
| 1       | -4,96 | 4,29  | -0,06 | 0,19  | 1,1   | -4,09 | -0,62 | -0,58 | -0,74 | 0,01  | -1    | 0,04  | -0,21 | 1,37  | -0,13 | -2,44 | -0,44 | -0,19 | -0,6  | 2,7   | -1,71 | -0,84 | -0,27 | -0,21 | -0,81 |
| 2       | -4,53 | -1,61 | -0,4  | -0,61 | -0,43 | -3,14 | 0,08  | 2,79  | 1,17  | -0,83 | -1,34 | -0,58 | -0,57 | 0,51  | -0,31 | 0,11  | -0,84 | -0,24 | -0,07 | -0,74 | 3,43  | -0,55 | -0,18 | -0,4  | -0,81 |
| CLASS11 |       |       |       |       |       |       |       |       |       |       |       |       |       |       |       |       |       |       |       |       |       |       |       |       |       |
| p       | KK    | KN    | KI    | KM    | KT    | NK    | NN    | NI    | NM    | NT    | IK    | IN    | II    | IM    | IT    | MK    | MN    | MI    | MM    | MT    | TK    | TN    | TI    | TM    | TT    |
| 1       | -3,53 | 1,6   | 0,01  | 1,51  | -1,46 | -3,38 | 0,76  | 0,05  | 0,04  | -1,7  | -0,32 | 0,22  | 0,33  | 0,12  | -0,41 | -1,64 | 0,79  | -0,02 | 0,96  | -1,57 | -4,27 | -1,12 | -0,34 | -1,56 | 3,71  |
| 2       | -3,93 | 0,42  | -0,04 | 0,06  | -1,59 | -0,98 | 0,33  | 0,46  | 0,32  | -0,92 | -0,45 | -0,13 | 0,1   | 0,14  | -0,47 | -0,73 | 0,09  | 0,14  | 1,49  | -1,58 | -3,94 | -1,93 | -0,1  | -1,53 | 3,55  |
| CLASS12 |       |       |       |       |       |       |       |       |       |       |       |       |       |       |       |       |       |       |       |       |       |       |       |       |       |
| p       | KK    | KN    | KI    | KM    | KT    | NK    | NN    | NI    | NM    | NT    | IK    | IN    | II    | IM    | IT    | MK    | MN    | MI    | MM    | MT    | TK    | TN    | TI    | TM    | TT    |
| 1       | -3,76 | 2,09  | 0,35  | 0,48  | 0,06  | -4,73 | -1,5  | -0,56 | -2,4  | -0,94 | -0,59 | 0,55  | -0,13 | 0     | 0,24  | -3,78 | 5,4   | -0,37 | -0,85 | 0,01  | -1,85 | 0,35  | -0,04 | -0,29 | 0,56  |
| 2       | -4,42 | -1,57 | -0,27 | -0,52 | -0,21 | 1,18  | -1,53 | 0,78  | 3,5   | 0,51  | -0,89 | -0,41 | 0,07  | -0,31 | 0,02  | -3,51 | -2,4  | -0,02 | 0,22  | -0,54 | -1,67 | -1,07 | 0,3   | 0,2   | 0,59  |
| CLASS13 |       |       |       |       |       |       |       |       |       |       |       |       |       |       |       |       |       |       |       |       |       |       |       |       |       |
| p       | KK    | KN    | KI    | KM    | KT    | NK    | NN    | NI    | NM    | NT    | IK    | IN    | II    | IM    | IT    | MK    | MN    | MI    | MM    | MT    | TK    | TN    | TI    | TM    | TT    |
| 1       | -4,16 | 0,1   | -0,02 | 0,37  | -0,77 | -2,6  | 0,48  | 0,22  | 0,5   | -0,98 | -0,48 | 0,12  | 0,09  | 0,11  | -0,25 | -2,89 | -0,89 | -0,4  | -1,73 | -2,04 | -1,7  | -0,02 | 0,12  | 6,51  | -1,83 |
| 2       | -3,89 | 0,45  | 0,49  | -0,64 | 0,37  | -3,04 | 0,57  | 0,08  | -0,86 | 0,11  | -0,83 | 0,08  | 0,07  | -0,25 | 0,14  | -1,8  | 0,34  | 0,17  | -1,63 | 6,31  | -2,96 | -0,8  | -0,4  | -2,18 | -1,75 |
| CLASS14 |       |       |       |       |       |       |       |       |       |       |       |       |       |       |       |       |       |       |       |       |       |       |       |       |       |
| p       | KK    | KN    | KI    | KM    | KT    | NK    | NN    | NI    | NM    | NT    | IK    | IN    | II    | IM    | IT    | MK    | MN    | MI    | MM    | MT    | TK    | TN    | TI    | TM    | TT    |
| 1       | -4,53 | 2,49  | 0,06  | 2,42  | -0,96 | -3,75 | -0,27 | 0,25  | -0,07 | -1,34 | -1,16 | -0,2  | 0,04  | -0,31 | -0,62 | -3,56 | -0,51 | -0,36 | -0,76 | -1,52 | -2,51 | 1,27  | 1,48  | 2,86  | -0,48 |
| 2       | -4,12 | -1,03 | 0,16  | -1,11 | -0,92 | 0,33  | 0,27  | 0,15  | -0,21 | -0,34 | 0,88  | 0,14  | -0,16 | -0,55 | 0,55  | -2,65 | 0,04  | -0,75 | -0,77 | 5,25  | -2,77 | -1,69 | -0,69 | -1,66 | -0,33 |

| CLASS15 |       |       |       |       |       |       |       |       |       |       |       |       |       |       |       |       |       |       |       |       |       |       |       |       |       |
|---------|-------|-------|-------|-------|-------|-------|-------|-------|-------|-------|-------|-------|-------|-------|-------|-------|-------|-------|-------|-------|-------|-------|-------|-------|-------|
| p       | KK    | KN    | KI    | KM    | KT    | NK    | NN    | NI    | NM    | NT    | IK    | IN    | II    | IM    | IT    | MK    | MN    | MI    | MM    | MT    | TK    | TN    | TI    | TM    | TT    |
| 1       | -3,84 | 0,22  | 0,51  | 0,16  | -0,68 | -2,1  | -0,23 | 0,16  | 2,39  | -0,87 | -0,87 | -0,21 | -0,08 | 0,08  | -0,31 | -3,59 | -1,45 | -0,37 | -1,55 | -2,21 | -1,89 | -0,41 | 0,35  | 5,65  | -1,45 |
| 2       | -3,87 | 0,42  | -0,16 | -0,67 | 0,54  | -2,62 | -0,27 | -0,05 | -1,55 | -0,37 | -0,3  | -0,14 | 0,18  | -0,26 | 0,63  | -2,46 | 2,97  | -0,05 | -1,62 | 5,33  | -2,82 | -1,04 | -0,34 | -2,23 | -1,31 |
| CLASS16 |       |       |       |       |       |       |       |       |       |       |       |       |       |       |       |       |       |       |       |       |       |       |       |       |       |
| p       | KK    | KN    | KI    | KM    | KT    | NK    | NN    | NI    | NM    | NT    | IK    | IN    | II    | IM    | IT    | MK    | MN    | MI    | MM    | MT    | TK    | TN    | TI    | TM    | TT    |
| 1       | -3,17 | 0,52  | 0,18  | -1,07 | 0,5   | -4,34 | -1,21 | -0,28 | -2,65 | -0,61 | -0,28 | 0,48  | -0,15 | -0,44 | 0,05  | -2,2  | 5,78  | -0,04 | -1,38 | 1,41  | -1,69 | -0,18 | -0,01 | -1,01 | -0,03 |
| 2       | -3,68 | -0,98 | 0,13  | 0,96  | -0,08 | -2,04 | -1,25 | 0,46  | 5,38  | -0,13 | -0,59 | -0,43 | -0,05 | 0,12  | -0,14 | -3,88 | -2,57 | -0,36 | -1,54 | -0,93 | -1,46 | -0,58 | 0,13  | 1,63  | -0,22 |
| CLASS17 |       |       |       |       |       |       |       |       |       |       |       |       |       |       |       |       |       |       |       |       |       |       |       |       |       |
| p       | KK    | KN    | KI    | KM    | KT    | NK    | NN    | NI    | NM    | NT    | IK    | IN    | II    | IM    | IT    | MK    | MN    | MI    | MM    | MT    | TK    | TN    | TI    | TM    | TT    |
| 1       | -4,41 | -0,24 | -0,11 | -0,41 | -1,06 | -4,11 | -0,02 | -0,76 | -1,18 | -1,61 | 0,38  | 0,37  | -0,07 | -0,55 | -0,13 | -0,68 | 0,51  | 0,13  | 0,42  | -1,24 | 0,8   | 3,46  | -0,27 | 0,18  | -0,89 |
| 2       | -4,24 | 0,21  | -0,02 | 1,07  | 2,18  | -3,79 | -0,3  | 1,42  | 2,96  | 1,11  | -1,18 | -0,89 | -0,27 | -0,42 | 0,63  | -2,37 | -0,82 | -0,17 | -1,03 | 1,4   | -2,49 | -2,04 | -0,32 | -1,38 | -0,34 |
| CLASS18 |       |       |       |       |       |       |       |       |       |       |       |       |       |       |       |       |       |       |       |       |       |       |       |       |       |
| p       | KK    | KN    | KI    | KM    | KT    | NK    | NN    | NI    | NM    | NT    | IK    | IN    | II    | IM    | IT    | MK    | MN    | MI    | MM    | MT    | TK    | TN    | TI    | TM    | TT    |
| 1       | -3,49 | 0,95  | 0,07  | 0,2   | -0,89 | -4,65 | -1,54 | -0,21 | -0,44 | -2,45 | -0,56 | 0,09  | -0,05 | -0,04 | -0,2  | -1,3  | 0,04  | 0,09  | 0,29  | -0,71 | -1,56 | 5,88  | 0,13  | 0,31  | -1,48 |
| 2       | -3,33 | -0,89 | 0,02  | 0,17  | 0,52  | -3,24 | -1,51 | 0,1   | -0,04 | 6,42  | -0,41 | -0,25 | -0,01 | -0,09 | 0,22  | -0,94 | -0,41 | -0,01 | 0,45  | -0,2  | -3,04 | -2,46 | -0,2  | -0,67 | -1,61 |

1. Matrices of 8 classes obtained as a result of classification of TRs with consensus length 7. Number of elements in each class: {45, 49, 146, 393, 66, 514, 158, 279}. Matrix element  $(p, a_i a_j)$ ,  $a_i, a_j = \{K, N, I, M, T\}$  should be interpreted as  $a_i$  before  $a_j$ ,  $a_j$  in consensus position  $p$ . Symbols  $\{K, N, I, M, T\}$  were obtained by re-coding of amino acid sequences according to side-chain polarity:  $K = \{G, A, V, I, L, P\}$ ;  $N = \{S, T, C, M, Q, N\}$ ;  $I = \{F, Y, W\}$ ;  $M = \{K, R, H\}$ ;  $T = \{D, E\}$

| CLASS0 |       |       |       |       |       |       |       |       |       |       |       |       |       |       |       |       |       |       |       |       |       |       |       |       |       |
|--------|-------|-------|-------|-------|-------|-------|-------|-------|-------|-------|-------|-------|-------|-------|-------|-------|-------|-------|-------|-------|-------|-------|-------|-------|-------|
| p      | KK    | KN    | KI    | KM    | KT    | NK    | NN    | NI    | NM    | NT    | IK    | IN    | II    | IM    | IT    | MK    | MN    | MI    | MM    | MT    | TK    | TN    | TI    | TM    | TT    |
| 1      | -3,89 | -0,52 | -0,16 | -1,06 | 0,66  | -1,81 | -0,22 | 0,49  | 0,16  | 0,39  | -0,33 | 0,49  | -0,1  | -0,14 | 0,05  | -0,35 | -0,28 | 0,03  | -0,6  | 0,53  | -2,38 | -0,5  | -0,09 | -0,96 | 0,12  |
| 2      | -4,89 | -0,38 | 0,4   | 0,09  | 3,56  | -3,51 | -0,35 | 0,24  | -0,75 | 0,67  | -0,25 | -0,23 | -0,16 | -0,06 | 0,24  | -2,62 | -0,49 | -0,28 | -0,81 | -0,46 | -1,47 | -0,6  | -0,2  | -0,55 | 2,57  |
| 3      | -4,6  | -0,32 | 0,22  | -0,75 | -0,44 | -2,98 | -0,51 | 0     | -0,62 | -0,8  | -0,14 | -0,25 | -0,01 | -0,08 | -0,14 | -1,85 | -0,26 | -0,23 | -1,02 | -1    | 1,56  | 3,11  | 0,02  | 0,05  | -0,02 |
| 4      | -4,21 | -0,32 | -0,16 | 2,78  | 0,03  | -3,12 | 1,48  | -0,08 | 0,48  | -0,06 | -0,21 | 0,06  | -0,07 | -0,36 | -0,01 | -2,83 | -0,57 | -0,19 | -0,15 | -0,57 | -2,78 | -0,71 | 0,11  | -0,27 | -0,49 |
| 5      | -4,78 | -0,37 | -0,14 | -0,58 | -0,45 | -3,3  | 0,8   | 0,04  | -0,05 | 0,02  | -0,67 | -0,16 | -0,02 | 0,11  | -0,07 | -2,2  | 0,1   | 0,02  | 4,18  | -0,58 | -2,35 | -0,69 | -0,13 | 0,09  | 0,25  |
| 6      | -4,04 | -0,58 | -0,24 | -0,56 | -0,99 | -2,06 | -0,25 | -0,17 | -0,53 | -0,08 | -0,28 | 0,09  | -0,03 | -0,36 | -0,13 | 0,66  | 0,82  | 0,46  | 0,61  | -0,63 | -1,74 | 0,56  | -0,05 | -0,68 | -0,65 |
| 7      | -3,61 | 1,16  | 0,27  | 1,75  | 0,08  | -3,03 | 0,57  | 0,3   | 0,27  | -0,14 | -0,38 | 0     | -0,1  | 0,14  | -0,13 | -2,52 | 0,08  | 0,06  | 0,15  | -0,94 | -2,02 | -0,42 | -0,06 | -1,01 | -0,67 |

CLASS1

| p | KK    | KN    | KI    | KM    | KT    | NK    | NN    | NI    | NM    | NT    | IK    | IN    | II    | IM    | IT    | MK    | MN    | MI    | MM    | MT    | TK    | TN    | TI    | TM    | TT    |
|---|-------|-------|-------|-------|-------|-------|-------|-------|-------|-------|-------|-------|-------|-------|-------|-------|-------|-------|-------|-------|-------|-------|-------|-------|-------|
| 1 | -3,37 | 0,97  | 1,47  | 3,88  | -0,44 | -2,84 | -0,33 | 0,92  | 1,21  | -0,48 | -0,88 | -0,02 | -0,28 | 0,13  | -0,37 | -2,93 | -0,58 | -0,42 | 0,44  | -0,74 | -2,97 | -0,89 | -0,21 | -0,56 | -1,1  |
| 2 | -4,32 | -0,53 | 0,3   | -0,22 | -0,51 | -3,11 | -0,11 | -0,29 | -0,15 | -0,03 | -1,06 | 0,24  | 0,38  | 0,75  | 0,39  | -2,53 | 0,87  | -0,16 | 0,12  | 4,42  | -3    | -0,81 | -0,12 | -0,5  | -0,83 |
| 3 | -4,69 | -0,29 | -0,19 | -0,7  | -0,54 | -2,77 | 0,25  | -0,25 | -0,51 | 0,03  | -0,88 | -0,07 | -0,18 | 0,19  | 0,15  | -2,6  | 0,37  | -0,27 | -0,3  | 0,08  | -1,23 | 2,17  | 0,18  | -0,4  | 0,21  |
| 4 | -4,18 | 0,02  | 0,65  | -0,68 | 0     | -2,66 | 0,14  | 0,6   | -0,56 | 2,46  | -0,78 | -0,19 | -0,12 | -0,4  | -0,11 | -3,02 | -0,54 | -0,26 | -0,82 | 0,33  | -1,54 | -0,19 | 0,38  | -0,71 | 0,17  |
| 5 | -4,09 | -0,27 | -0,08 | -0,35 | 0,66  | -2,44 | -0,43 | -0,25 | -0,38 | 0,11  | 0,08  | 0,49  | -0,16 | -0,08 | 0,1   | -2,93 | -0,57 | -0,21 | -0,87 | -0,8  | -2,19 | -0,43 | -0,23 | -0,18 | 3,03  |
| 6 | -4,14 | 0,36  | -0,26 | -0,12 | 0,01  | -3,2  | 0,06  | 0,06  | -0,36 | -0,47 | -0,91 | -0,17 | -0,06 | -0,28 | -0,26 | -2,88 | -0,58 | -0,31 | 0,08  | -0,7  | -2,57 | 0,43  | -0,11 | 4,3   | -0,83 |
| 7 | -3,91 | -0,33 | -0,25 | -0,73 | -0,87 | -1,85 | 0,47  | 0,04  | -0,3  | -0,86 | -0,89 | -0,17 | -0,13 | -0,2  | -0,15 | 2,37  | 1,2   | 0,06  | -0,15 | -0,81 | -2,12 | -0,72 | -0,32 | -0,55 | -0,9  |

CLASS2

| p | KK    | KN    | KI    | KM    | KT    | NK    | NN    | NI    | NM    | NT    | IK    | IN    | II    | IM    | IT    | MK    | MN    | MI    | MM    | MT    | TK    | TN    | TI    | TM    | TT    |
|---|-------|-------|-------|-------|-------|-------|-------|-------|-------|-------|-------|-------|-------|-------|-------|-------|-------|-------|-------|-------|-------|-------|-------|-------|-------|
| 1 | -4,66 | 0,22  | 0,55  | 0,69  | 1,29  | -2,65 | -0,21 | 0,18  | 0,05  | -0,23 | -1,03 | -0,18 | -0,06 | -0,11 | -0,09 | -1,85 | -0,28 | 0,08  | -0,1  | 0,07  | -1,08 | -0,25 | -0,04 | 0,13  | -0,13 |
| 2 | -5,15 | -0,61 | 0,24  | -0,05 | 0,19  | -2,57 | -0,26 | 0,12  | -0,3  | 0,29  | -0,38 | -0,19 | 0,07  | 0,2   | 0,73  | -0,61 | -0,04 | 0,35  | -0,23 | 0,18  | -0,24 | -0,1  | 0,17  | 0,15  | 0,05  |
| 3 | -3,26 | -0,9  | 0,26  | -0,66 | 0,2   | -2,26 | -0,61 | -0,13 | -0,55 | -0,27 | 0,17  | -0,13 | -0,14 | -0,13 | 0,11  | -0,84 | -0,59 | -0,07 | -0,39 | -0,2  | 0     | -0,33 | 0,26  | -0,1  | -0,14 |
| 4 | -5,85 | 5,71  | -0,11 | -0,33 | 0,06  | -3,85 | 0,45  | -0,44 | -0,59 | -0,48 | -1,17 | 1,24  | -0,14 | -0,24 | -0,12 | -2,39 | 0,26  | -0,34 | -0,3  | -0,42 | -1,95 | 0,94  | -0,17 | -0,21 | -0,01 |
| 5 | -5,61 | -1,63 | -0,6  | -1,19 | -1,02 | 5,99  | -0,5  | 0,12  | -0,21 | 0,2   | -0,53 | -0,54 | -0,27 | -0,57 | -0,26 | -1,46 | -0,6  | -0,25 | -0,53 | -0,39 | -0,75 | -0,68 | -0,35 | -0,45 | -0,36 |
| 6 | -4,9  | 1,46  | 1,33  | 5,57  | 1,39  | -3,98 | -0,99 | -0,33 | -0,06 | -0,57 | -1,4  | -0,37 | 0,08  | 0,11  | -0,13 | -2,53 | -0,78 | -0,13 | -0,27 | -0,37 | -2,02 | -0,62 | -0,05 | -0,02 | -0,27 |
| 7 | -5,75 | -1,23 | -0,61 | -0,93 | -0,63 | -2,73 | -0,06 | -0,19 | -0,13 | 0,03  | 0,11  | 0,17  | 0     | 0,01  | -0,03 | 2,36  | 0,97  | 0,18  | 0,54  | 0,6   | -0,74 | -0,05 | 0,1   | -0,11 | 0,15  |

CLASS3

| p | KK    | KN    | KI    | KM    | KT    | NK    | NN    | NI    | NM    | NT    | IK    | IN    | II    | IM    | IT    | MK    | MN    | MI    | MM    | MT    | TK    | TN    | TI    | TM    | TT    |
|---|-------|-------|-------|-------|-------|-------|-------|-------|-------|-------|-------|-------|-------|-------|-------|-------|-------|-------|-------|-------|-------|-------|-------|-------|-------|
| 1 | -5,32 | -0,84 | -0,29 | -0,29 | 0,21  | -4,07 | 0,49  | 0,06  | 0,85  | 1,59  | -1,11 | 0     | -0,02 | -0,02 | 0,05  | -2,59 | 0,06  | -0,03 | 0,57  | 1,03  | -2,62 | 0,29  | -0,12 | 0,53  | 0,91  |
| 2 | -3,94 | -1,77 | -0,18 | -1,05 | -1,39 | -0,65 | -1,15 | 0,33  | -0,81 | -1,17 | -0,21 | -0,51 | 0,01  | -0,22 | -0,27 | 1,02  | -0,65 | 0,58  | -0,48 | -0,82 | 2,75  | -0,46 | 0,28  | -0,16 | -0,84 |
| 3 | -3,37 | 5,08  | 0,3   | 1,86  | 2,15  | -4,76 | -1,03 | -0,4  | -0,64 | -0,86 | -0,79 | 0,55  | -0,06 | 0,27  | 0,33  | -2,96 | -0,52 | -0,34 | -0,5  | -0,36 | -3,19 | -1,09 | -0,43 | -0,86 | -0,89 |
| 4 | -5,32 | -0,9  | -0,39 | -0,49 | -0,29 | -3,83 | 1,34  | 0,21  | 1,07  | 1,78  | -1,1  | -0,24 | -0,11 | -0,03 | -0,05 | -2,53 | 0,12  | -0,1  | 0,27  | 0,71  | -2,66 | 0,21  | 0,02  | 0,46  | 0,74  |
| 5 | -4,1  | -1,55 | 0,03  | -1,03 | -1,25 | -0,78 | -0,73 | 0,46  | -0,61 | -0,95 | -0,37 | -0,26 | -0,04 | -0,12 | -0,36 | 0,27  | -0,41 | 0,48  | -0,4  | -0,59 | 0,99  | 0,01  | 0,37  | -0,04 | -0,47 |
| 6 | -4,04 | 3,31  | 0,3   | 2,36  | 1,55  | -4,43 | -0,55 | -0,17 | -0,37 | -0,62 | -0,75 | 0,61  | 0,02  | 0,43  | 0,4   | -2,54 | -0,66 | -0,1  | -0,54 | -0,27 | -2,94 | -0,91 | -0,32 | -0,57 | -0,8  |
| 7 | -5,16 | -0,79 | -0,27 | -0,55 | -0,44 | -3,64 | 1,3   | 0,14  | 0,64  | 0,52  | -0,94 | 0,14  | -0,06 | 0     | -0,02 | -2,19 | 0,83  | -0,01 | 0,35  | 0,63  | -2,18 | 0,3   | -0,18 | 0,31  | 0,1   |

CLASS4

| p | KK    | KN    | KI    | KM    | KT    | NK    | NN    | NI    | NM    | NT    | IK    | IN    | II    | IM    | IT    | MK    | MN    | MI    | MM    | MT    | TK    | TN    | TI    | TM    | TT    |
|---|-------|-------|-------|-------|-------|-------|-------|-------|-------|-------|-------|-------|-------|-------|-------|-------|-------|-------|-------|-------|-------|-------|-------|-------|-------|
| 1 | 0,72  | 0,54  | 0,67  | 0,87  | 1,19  | -4,21 | -1,32 | -0,5  | -0,95 | -0,57 | -1,01 | -0,41 | -0,12 | -0,41 | -0,09 | -2,37 | -0,88 | -0,27 | -0,37 | -0,19 | -1,96 | -0,78 | -0,35 | -0,45 | -0,65 |
| 2 | -5,21 | 1,63  | 0,41  | 1,15  | 1,27  | -4,12 | -0,45 | -0,25 | -0,16 | -0,12 | -0,98 | -0,06 | 0,22  | -0,25 | 0,18  | -2,27 | -0,23 | 0,07  | 0,12  | -0,01 | -1,87 | -0,09 | 0,15  | -0,06 | 0,73  |
| 3 | -5,55 | -1,23 | -0,14 | -0,66 | -0,37 | -2,97 | -0,21 | 0,74  | 0,47  | 0,99  | -0,52 | 0,08  | -0,07 | 0,21  | 0,08  | -1,04 | -0,27 | 0,34  | 0,28  | 0,5   | -0,42 | -0,14 | 0,38  | 0,73  | 0,4   |
| 4 | -4,95 | -0,21 | 0,07  | 0,21  | 0,57  | -3,57 | -0,75 | 0     | -0,32 | -0,02 | -0,31 | 0,15  | 0,26  | 0,06  | 0,34  | -0,97 | -0,08 | 0,49  | 0,15  | -0,09 | -0,02 | -0,27 | 0,64  | -0,09 | 0,02  |
| 5 | -5,2  | 0,41  | -0,16 | 0,77  | 0,08  | -3,52 | -0,32 | -0,36 | 0,35  | -0,25 | -0,18 | 0     | -0,02 | 1     | 0,07  | -1,99 | -0,25 | 0     | 0,49  | 0,26  | -1,56 | 0,03  | 0,1   | 1,39  | 0,01  |
| 6 | -6,02 | 1,22  | -0,13 | -0,66 | -0,75 | -4,42 | 2,48  | -0,45 | -0,63 | -0,24 | -1,08 | 0,36  | -0,26 | -0,21 | -0,28 | -2,38 | 4,7   | 0,04  | -0,22 | -0,07 | -2,07 | 1,34  | -0,19 | -0,14 | -0,33 |
| 7 | -5,58 | -1,66 | -0,58 | -1,08 | -1,07 | 6,7   | -0,75 | -0,06 | -0,19 | -0,45 | -0,68 | -0,62 | -0,17 | -0,26 | -0,35 | -1,58 | -1,07 | -0,25 | -0,43 | -0,4  | -1,02 | -0,82 | -0,18 | -0,61 | -0,65 |

CLASS5

| p | KK    | KN    | KI    | KM    | KT    | NK    | NN    | NI    | NM    | NT    | IK    | IN    | II    | IM    | IT    | MK    | MN    | MI    | MM    | MT    | TK    | TN    | TI    | TM    | TT    |
|---|-------|-------|-------|-------|-------|-------|-------|-------|-------|-------|-------|-------|-------|-------|-------|-------|-------|-------|-------|-------|-------|-------|-------|-------|-------|
| 1 | -3,82 | 4,68  | 0,26  | 1,45  | 4,16  | -4,59 | -0,98 | -0,34 | -0,86 | -0,42 | -0,98 | 0,36  | 0,02  | 0,48  | 0,43  | -2,92 | -0,82 | -0,34 | -0,82 | -0,69 | -3,43 | -1,01 | -0,44 | -0,8  | -0,91 |
| 2 | -5,7  | -0,81 | -0,34 | -0,48 | -0,98 | -3,05 | 1,27  | 0,15  | 1,09  | 0,62  | -0,89 | -0,05 | -0,11 | -0,12 | -0,17 | -2,43 | 0,02  | -0,05 | 0,34  | -0,05 | -1,91 | 0,86  | 0,1   | 1,07  | 0,99  |
| 3 | -5,34 | -0,61 | -0,21 | -0,23 | -0,51 | -3,23 | 0,74  | 0,08  | 0,96  | 0,16  | -0,69 | 0,11  | -0,04 | -0,19 | -0,08 | -1,48 | 0,74  | 0,18  | 0,75  | 0,09  | -2,41 | 0,13  | 0,02  | 0,7   | 0,18  |
| 4 | -3,99 | -1,02 | -0,03 | -0,08 | -1,24 | -0,57 | -0,81 | 0,24  | 0,03  | -0,97 | -0,4  | -0,27 | 0,14  | -0,04 | 0,03  | 0,9   | -0,34 | 0,88  | -0,34 | -0,63 | -0,53 | -0,77 | 0,18  | -0,09 | -1,04 |
| 5 | -4,33 | 1,96  | 0,15  | 1,72  | 3,06  | -4,1  | -0,77 | -0,36 | -0,4  | -0,37 | -0,81 | 0,32  | -0,03 | 0,37  | 0,85  | -2,29 | 0,15  | -0,18 | 0,23  | -0,19 | -3,3  | -0,9  | -0,3  | -0,76 | -0,74 |
| 6 | -5,64 | -0,57 | -0,41 | -0,65 | -0,44 | -3,67 | 0,97  | -0,03 | 0,02  | 0,72  | -0,86 | -0,07 | -0,11 | -0,15 | -0,14 | -2,11 | 0,6   | -0,04 | 0,1   | 0,88  | -2,46 | 0,91  | 0,21  | 0,52  | 1,86  |
| 7 | -3,52 | -1,58 | -0,27 | -1,28 | -1,47 | 1,07  | -0,91 | 0,29  | -0,89 | -0,99 | 0,04  | -0,51 | -0,04 | -0,27 | -0,41 | -0,03 | -0,83 | 0,43  | -0,66 | -0,92 | 2,2   | -0,62 | 0,4   | -0,66 | -0,82 |

CLASS6

| p | KK    | KN    | KI    | KM    | KT    | NK    | NN    | NI    | NM    | NT    | IK    | IN    | II    | IM    | IT    | MK    | MN    | MI    | MM    | MT    | TK    | TN    | TI    | TM    | TT    |
|---|-------|-------|-------|-------|-------|-------|-------|-------|-------|-------|-------|-------|-------|-------|-------|-------|-------|-------|-------|-------|-------|-------|-------|-------|-------|
| 1 | -5,14 | 6,09  | 0,28  | 0,26  | 0,93  | -4,2  | -0,24 | -0,48 | -0,71 | -0,6  | -1,27 | 0,12  | -0,2  | -0,25 | -0,11 | -2,43 | 0     | -0,2  | -0,44 | -0,29 | -2,25 | 0,32  | -0,21 | -0,31 | -0,37 |
| 2 | -5,56 | -1,78 | -0,42 | -0,91 | -0,96 | 3,33  | 0,27  | 0,41  | -0,13 | -0,01 | -0,71 | -0,19 | -0,12 | -0,3  | -0,11 | -1,28 | -0,61 | -0,2  | -0,53 | -0,36 | -0,77 | -0,46 | -0,15 | -0,13 | -0,32 |
| 3 | -2,86 | 1,46  | 0,6   | 0,81  | 1,15  | -3,56 | -0,59 | -0,04 | -0,52 | -0,55 | -0,52 | -0,22 | -0,08 | -0,24 | -0,12 | -1,93 | -0,58 | -0,08 | -0,32 | -0,35 | -1,81 | -0,7  | 0     | -0,35 | -0,27 |
| 4 | -5,36 | 0,04  | 0,07  | 0,26  | 1,06  | -3,42 | 0,94  | -0,01 | 0,14  | 0,17  | -0,66 | 0,37  | 0,16  | 0,16  | 0,07  | -1,38 | 0,04  | 0,09  | -0,07 | -0,08 | -1,5  | 0,35  | 0,07  | 0,21  | 0,16  |
| 5 | -5,03 | -0,85 | -0,38 | -0,46 | -0,37 | -1,18 | 0,01  | 0,07  | -0,15 | -0,02 | -0,42 | 0,16  | -0,12 | 0     | -0,2  | -0,71 | 0,01  | -0,01 | -0,07 | -0,08 | -0,26 | 0,14  | 0,05  | 0,18  | 0,13  |
| 6 | -5,37 | -0,49 | 0,95  | 3,05  | 1,11  | -3,68 | -0,43 | 0,17  | 0,86  | 0,44  | -1,06 | -0,33 | 0,18  | 0,31  | 0,18  | -2,15 | -0,22 | 0,25  | 0,1   | 0,22  | -2,09 | -0,4  | 0,22  | 0,7   | 0,21  |
| 7 | -5,07 | -1,5  | -0,55 | -0,94 | -0,79 | -2,15 | -0,97 | -0,39 | -0,65 | -0,62 | 0,81  | 0,02  | -0,13 | 0,01  | 0,06  | 3,5   | -0,32 | 0,1   | -0,14 | 0,12  | 1,31  | -0,57 | -0,1  | -0,23 | -0,13 |

CLASS7

| p | KK    | KN    | KI    | KM    | KT    | NK    | NN    | NI    | NM    | NT    | IK    | IN    | II    | IM    | IT    | MK    | MN    | MI    | MM    | MT    | TK    | TN    | TI    | TM    | TT    |
|---|-------|-------|-------|-------|-------|-------|-------|-------|-------|-------|-------|-------|-------|-------|-------|-------|-------|-------|-------|-------|-------|-------|-------|-------|-------|
| 1 | -4,01 | 0,97  | 0,6   | 1,31  | 3     | -4,04 | -0,95 | -0,31 | -0,44 | -0,25 | -1,2  | -0,18 | -0,15 | 0,06  | 0,24  | -1,86 | -0,29 | -0,03 | -0,11 | 0,03  | -1,74 | -0,43 | 0     | -0,05 | -0,04 |
| 2 | -5,25 | -0,83 | -0,05 | -0,19 | -0,4  | -2,85 | -0,21 | 0,13  | -0,03 | -0,11 | -0,63 | 0,01  | 0,09  | 0,03  | -0,04 | -0,53 | 0,14  | 0,29  | 0,01  | -0,08 | 1,03  | 0,07  | 0,34  | 0,44  | 0,15  |
| 3 | -4,32 | 0,21  | 0,37  | 0,51  | 0,37  | -3,12 | -0,44 | 0,18  | -0,08 | 0,06  | -0,48 | 0,13  | 0,05  | 0,09  | 0,18  | -1,26 | -0,04 | 0,16  | 0,02  | 0,14  | -1,52 | -0,21 | 0,11  | 0,04  | -0,15 |
| 4 | -5,25 | -0,48 | -0,05 | 0,45  | 0,72  | -3,26 | 0,21  | 0,07  | 0,34  | 0     | -0,6  | 0,28  | 0,04  | 0,44  | 0,07  | -1,37 | 0,38  | 0,19  | 0,34  | 0,06  | -1,06 | 0,12  | 0,1   | 0,52  | -0,15 |
| 5 | -3,76 | -1,48 | -0,27 | -0,46 | -0,67 | -0,83 | -1,01 | -0,3  | -0,44 | -0,48 | 0,17  | -0,52 | -0,27 | -0,15 | -0,13 | 0,82  | -0,52 | -0,02 | -0,07 | -0,09 | 0,48  | -0,66 | -0,19 | -0,17 | -0,3  |
| 6 | -5,73 | 7,73  | 0,08  | 0,05  | -0,09 | -4,43 | -0,43 | -0,36 | -0,73 | -0,71 | -1,44 | 0,28  | -0,05 | -0,15 | -0,25 | -2,15 | 0,32  | 0,11  | -0,31 | -0,38 | -2,24 | 0,15  | -0,18 | -0,31 | -0,31 |
| 7 | -5,85 | -1,99 | -0,59 | -0,96 | -0,98 | 3,91  | 0,41  | 0,51  | 0,69  | 0,69  | -0,46 | -0,47 | -0,24 | -0,07 | -0,15 | -1,14 | -0,83 | -0,28 | -0,37 | -0,36 | -1,33 | -0,84 | -0,23 | -0,39 | -0,48 |
